# Supplementary material for: Competitive binding-accelerated insulin release from a polypeptide nanogel for potential therapy of diabetes
Source: Royal Society of Chemistry journal article supplement (doi:10.1039/c5py00207a), 2015-01-01
Supplement: c5py00207a1.pdf [file c5py00207a1.pdf]

## Electronic Supplementary Information (ESI)

### **Competitive binding-accelerated insulin release from polypeptide nanogel for potential therapy of diabetes**

Li Zhao,<sup>a,b</sup> Chunsheng Xiao,<sup>a</sup> Jianxun Ding,<sup>a</sup> Xiuli Zhuang,<sup>a</sup> Guangqing Gai,<sup>b</sup> Liyan Wang<sup>c</sup> and Xuesi Chen<sup>\*a</sup>

<sup>a</sup>Key Laboratory of Polymer Ecomaterials, Changchun Institute of Applied Chemistry, Chinese Academy of Sciences, Changchun 130022, P. R. China. E-mail: xschen@ciac.ac.cn, Tel./Fax: +86 431 8526-2112

<sup>b</sup>Laboratory of Building Energy-Saving Technology Engineering, Jilin Jianzhu University, Changchun 130118, P. R. China

<sup>c</sup>College of Material Science and Engineering, Jilin Jianzhu University, Changchun 130118, P. R. China

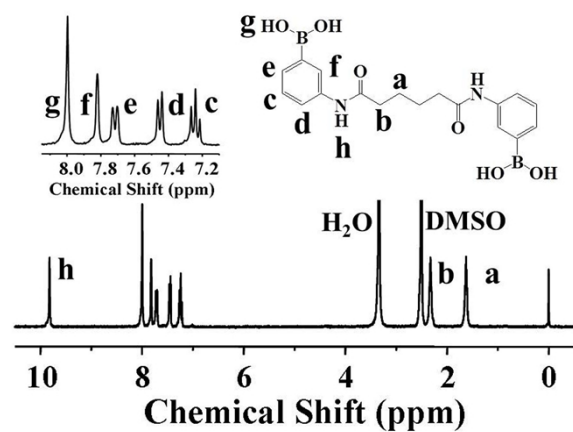

Fig. S1  $^1\text{H}$  NMR spectrum of AAPBA in  $\text{DMSO-}d_6$ .

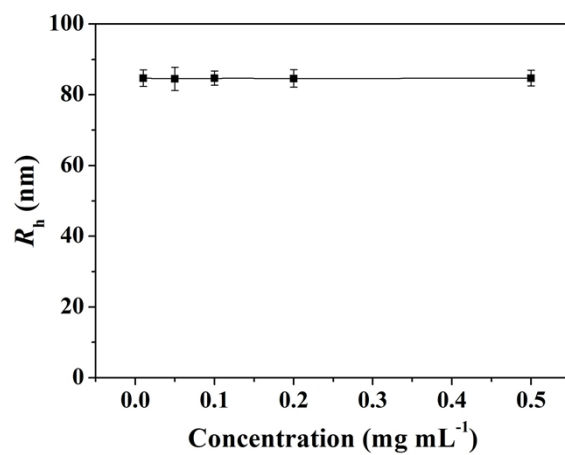

Fig. S2  $R_h$  of nanogel as a function of nanogel concentration in PBS at pH 7.4.

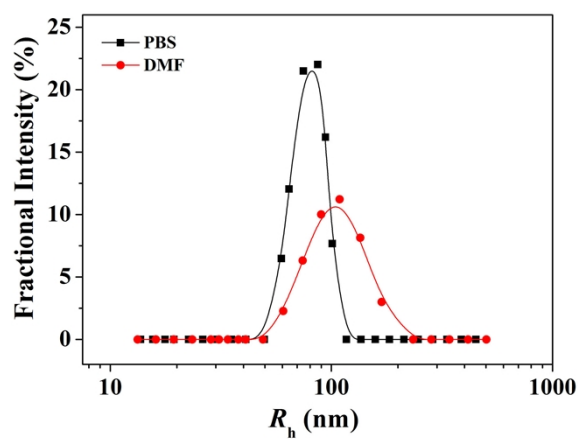

Fig. S3 Size distributions of nanogel in PBS at pH 7.4 or DMF at concentration of  $0.10 \text{ mg mL}^{-1}$ .

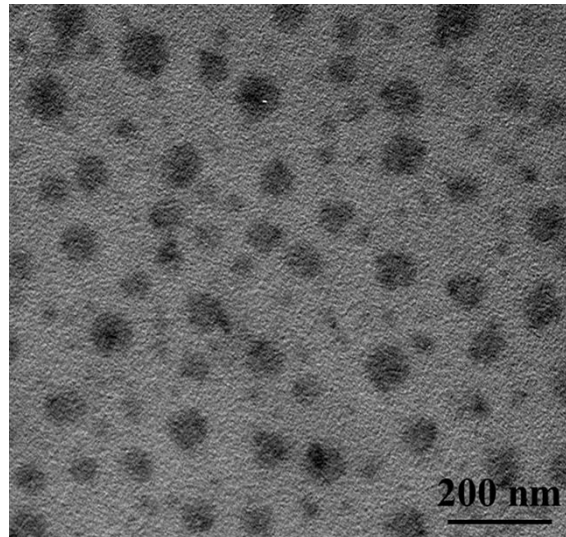

**Fig. S4** Typical TEM micrograph of nanogel in PBS at pH 7.4 with a glucose concentration of 3.0 mg mL<sup>-1</sup>.

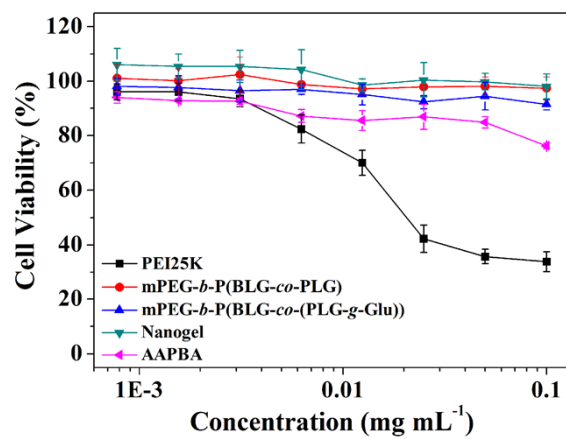

**Fig. S5** *In vitro* cytotoxicity of nanogel to HeLa cells with PEI25k and AAPBA as positive controls. Data were represented as mean  $\pm$  standard deviation ( $n = 3$ ).
